# Supplementary material for: Removal of Naphthalene, Fluorene and Phenanthrene by Recyclable Oil Palm Leaves’ Waste Activated Carbon Supported Nano Zerovalent Iron (N-OPLAC) Composite in Wastewater
Source: MDPI journal article supplement (doi:10.3390/w15050967), 2023-03-02
Supplement: s1 [file s1]

Supplementary Materials

# Removal of Naphthalene, Fluorene and Phenanthrene by Recyclable Oil Palm Leaves Waste Activated Carbon Supported Nano Zerovalent Iron (N-OPLAC) Composite in Wastewater

Hifsa Khurshid <sup>1,\*</sup>, Muhammad Raza Ul Mustafa <sup>2</sup> and Zeyneb Kilic <sup>3</sup>

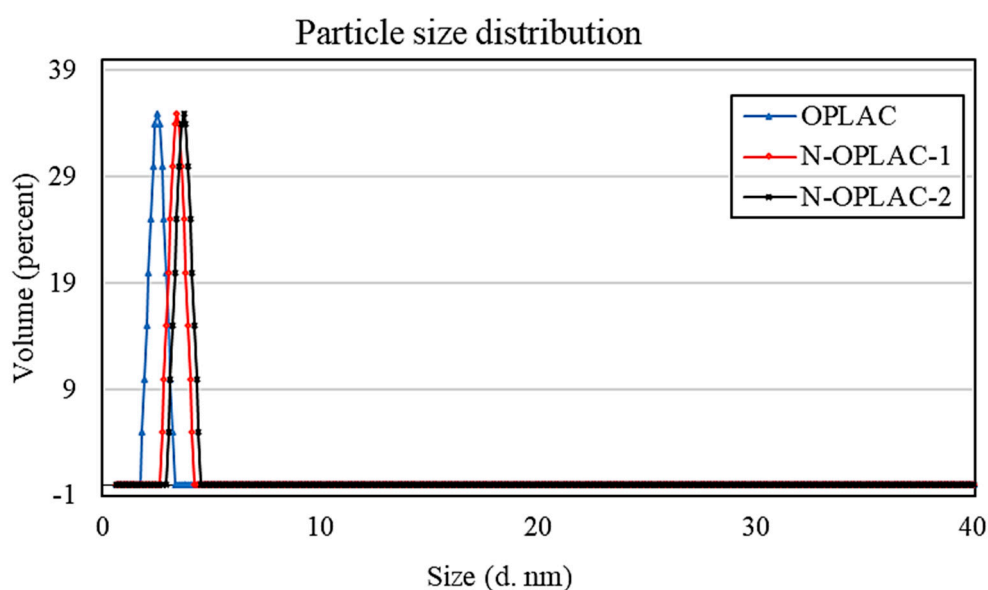

**Figure S1.** Particle size distribution.

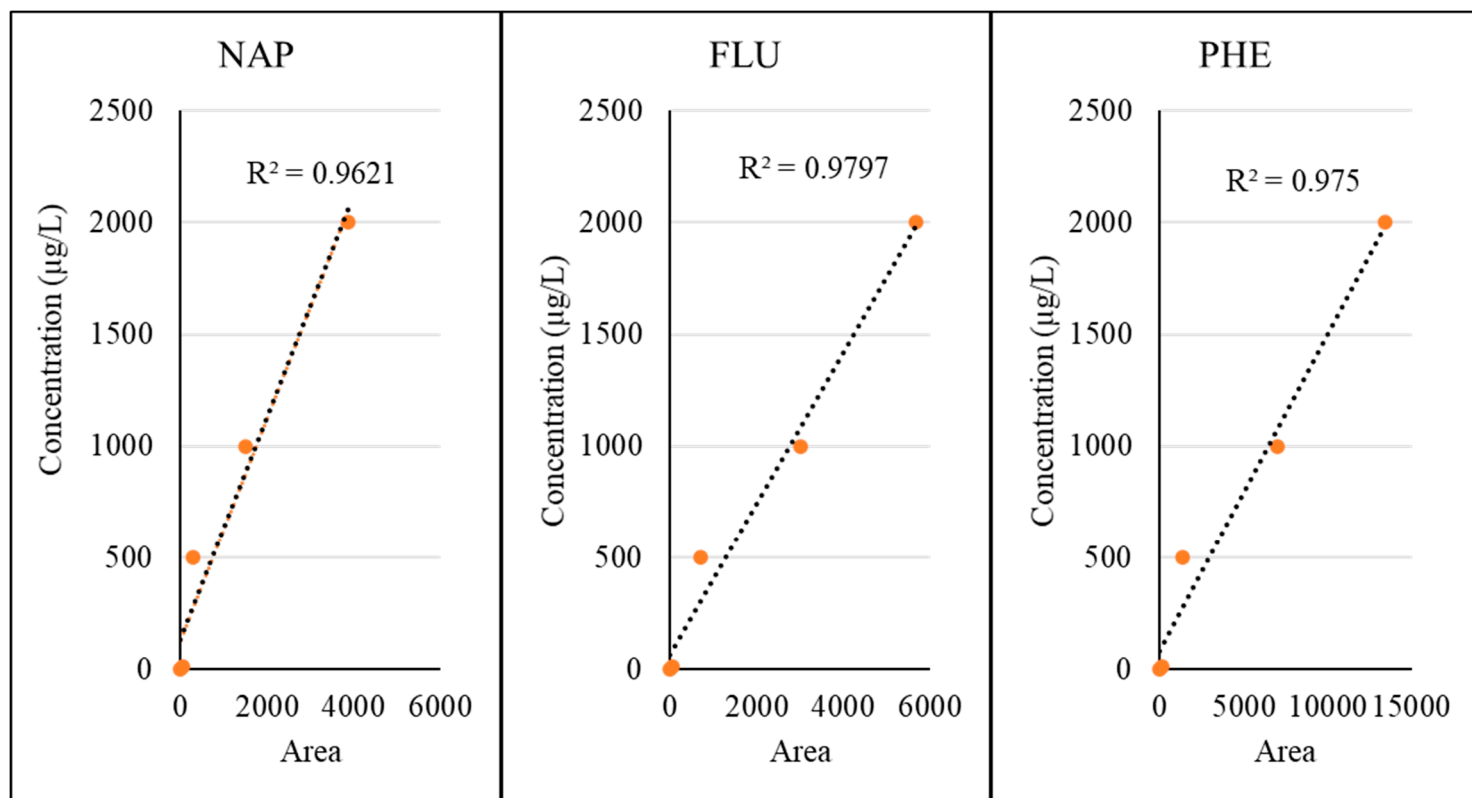

**Figure S2.** Calibration Curves for NAP, FLU and PHE.

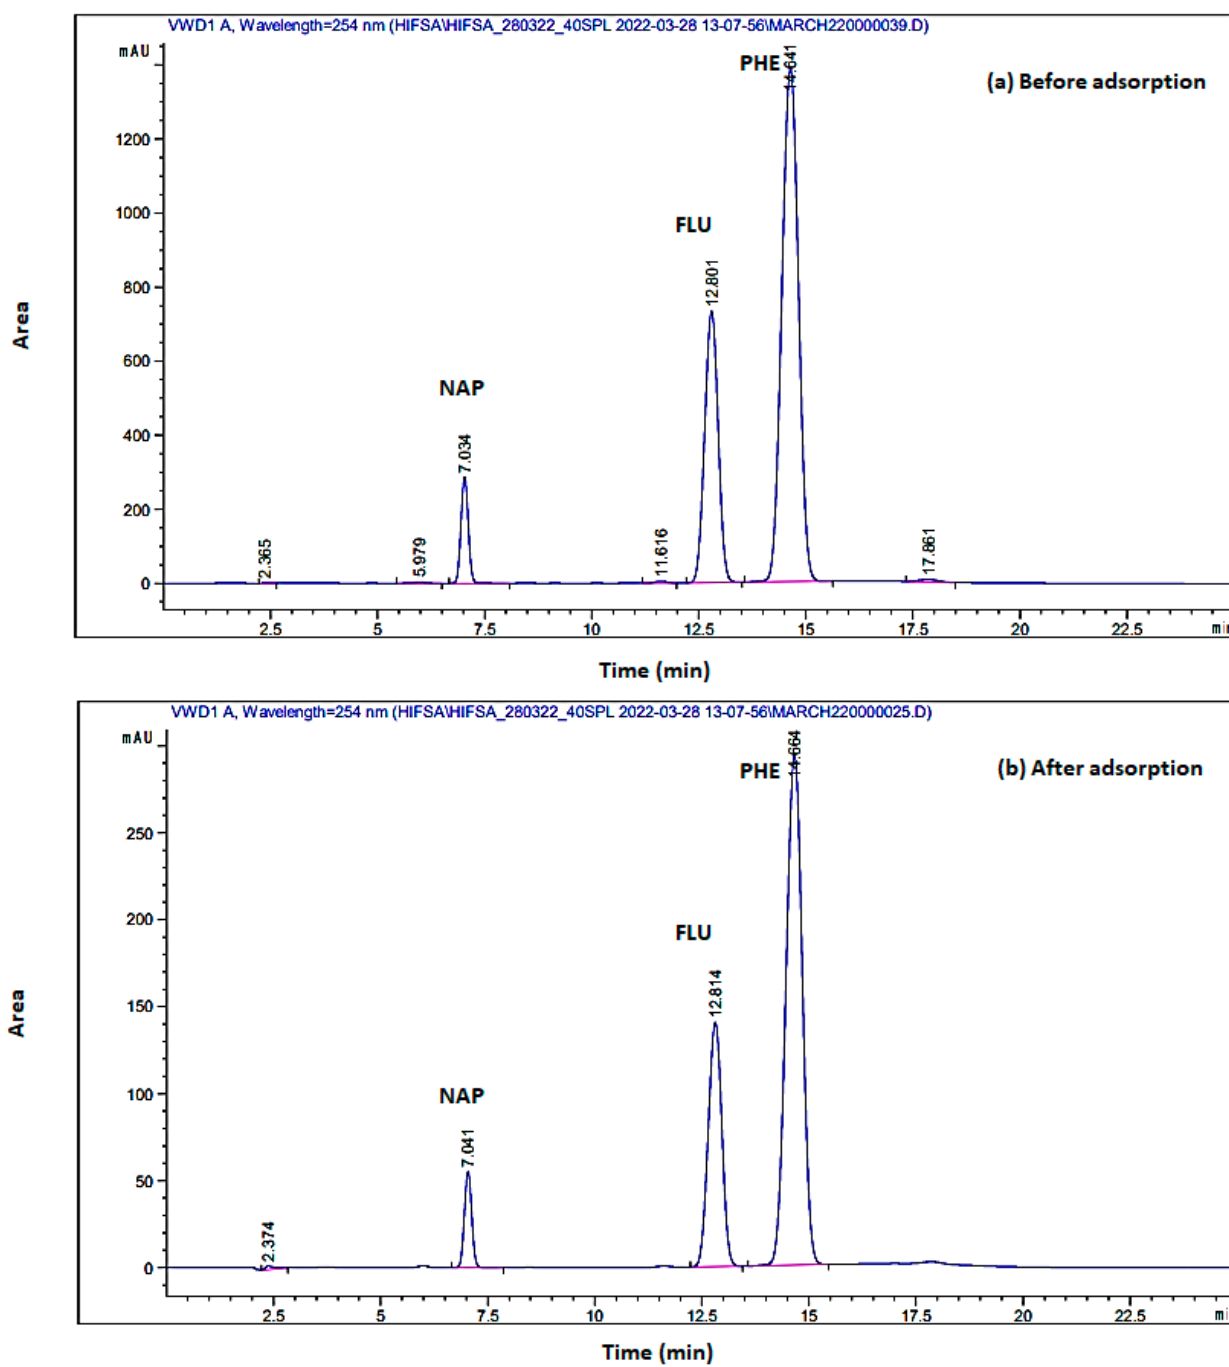

Figure S3. HPLC chromatogram before and after adsorption of NAP, FLU and PHE.
